CORRECTION

# Correction: Discontinuation and tapering of prescribed opioids and risk of overdose among people on long-term opioid therapy for pain with and without opioid use disorder in British Columbia, Canada: A retrospective cohort study

The *PLOS Medicine* Staff

## Notice of Republication

This article was republished on March 1, 2023, to provide the correct Academic Editor name. Please download this article again to view the correct version.

## Reference

1. Kennedy MC, Crabtree A, Nolan S, Mok WY, Cui Z, Chong M, et al. (2022) Discontinuation and tapering of prescribed opioids and risk of overdose among people on long-term opioid therapy for pain with and without opioid use disorder in British Columbia, Canada: A retrospective cohort study. *PLoS Med* 19 (12): e1004123. <https://doi.org/10.1371/journal.pmed.1004123> PMID: 36454732

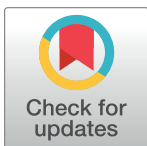

## OPEN ACCESS

**Citation:** The *PLOS Medicine* Staff (2023) Correction: Discontinuation and tapering of prescribed opioids and risk of overdose among people on long-term opioid therapy for pain with and without opioid use disorder in British Columbia, Canada: A retrospective cohort study. *PLoS Med* 20(3): e1004213. <https://doi.org/10.1371/journal.pmed.1004213>

**Published:** March 21, 2023

**Copyright:** © 2023 The PLOS Medicine Staff. This is an open access article distributed under the terms of the [Creative Commons Attribution License](https://creativecommons.org/licenses/by/4.0/), which permits unrestricted use, distribution, and reproduction in any medium, provided the original author and source are credited.
